# Supplementary material
Source: PubMed Central journal article supplement (PMC2783589)
Supplement: NIHMS156851-supplement-1_si_001.pdf [file NIHMS156851-supplement-1_si_001.pdf]

**Table S1.** Oligonucleotide lists for cloning *cpaD* from *A. oryzae* RIB40 and *A. flavus* NRRL3357

| <b>OLIGO No.</b> | <b>Sequence</b>                          | <b>Description</b>                                              |
|------------------|------------------------------------------|-----------------------------------------------------------------|
| OLIGO_XL116      | GATCGGATCCATGGAGATCTCCAAGAAAGCAGCAACAC   | 5' BamHI RIB40 <i>cpaD</i> long exon                            |
| OLIGO_XL105      | GTCCACATCGGGATAGTAGGATGCCAAATCCGCTGG     | 3' RIB40 <i>cpaD</i> long exon                                  |
| OLIGO_XL106      | GATTTGGCATCCTACTATCCCGATGTGGACCTGCAGAC   | 5' RIB40 <i>cpaD</i> short exon                                 |
| OLIGO_XL117      | GATTGCGGCCGCCTAAGGATTGTGGCC              | 3' NotI RIB40 <i>cpaD</i> short exon                            |
| OLIGO_XL192      | GATCGGATCCATGGCGAGTGCCGGCTATGATGTTC      | 5' BamHI NRRL3357 <i>cpaD</i> long exon                         |
| OLIGO_XL193      | AGTCCACATCCGGATAGTACGATGCCAAATC          | 3' NRRL3357 <i>cpaD</i> long exon                               |
| OLIGO_XL194      | GATTTGGCATCGTACTATCCCGATGTGGACTTAAATACTG | 5' NRRL3357 <i>cpaD</i> short exon                              |
| OLIGO_XL195      | GAGTGC GGCCGCTTAATGATTGTGGCCATC          | 3' NotI NRRL3357 <i>cpaD</i> short exon                         |
| OLIGO_XL196      | GATCGGATCCATGGAGATCTCCAGGAAAGCAGC        | 5' BamHI NRRL3357 <i>cpaD</i> ( <b>new sequence</b> ) long exon |

**Table S2.** Oligonucleotide lists for generating CpaD mutants.

| CpaD mutant | Oligonucleotide sequence            |
|-------------|-------------------------------------|
| CpaD E93L   | CTTCGGACTTCCTTTCCTGCTGAGCTTCAATTAC  |
| CpaD S95A   | CTTCCTTTCGAGCTGGCGTTCAATTACTCCAAATC |
| CpaD N97L   | TTCGAGCTGAGCTTCCGTACTCCAAATCACTAC   |
| CpaD R104E  | CTCCAAATCACTACTAGAATTTGCATTCGAGCCC  |
| CpaD D119L  | CGGGAACGAAGGATCTGCCATTCAACACCCAG    |
| CpaD D181L  | GAACAAACTGGCAGCCCTGCTGGAGCCATCTGGC  |
| CpaD K191E  | GGCGATATTGTCTTGGAAACCTACATCTACCCG   |
| CpaD T203V  | GATCAAGTCGATCGCGGTTGGGACCCCAAAGAG   |
| CpaD D250L  | CACTTTCTCTCATGCCTGTTGGTCAAGCCGTCC   |
| CpaD R258E  | CAAGCCGTCCGAGTCCGAAATCAAGGTCTACTG   |
| CpaD K260E  | CCGAGTCCCGAATCGAAGTCTACTGTATGGAAC   |
| CpaD W33F   | GACCACACAAAATGGTCTATAGCACAGCTCCG    |
| CpaD W33L   | GACCACACAAAATGGCTGTATAGCACAGCTCCG   |
| CpaD Y193F  | ATTGTCTTGAAGACCTTCATCTACCCGCGGATC   |
| CpaD Y193L  | ATTGTCTTGAAGACCCTGATCTACCCGCGGATC   |
| CpaD Y262F  | CCCGAATCAAGGTCTTCCCTGGCGTTCCATACA   |
| CpaD W299F  | CGCTGAGGGAGCTGTTCCAGCTATTGCCCGTC    |
| CpaD W299L  | CGCTGAGGGAGCTGCTGCAGCTATTGCCCGTC    |
| CpaD Y346F  | CCGAACCACAGATCTTCTTCCCTGCTTTTGGG    |
| CpaD Y410F  | CAAGGGGAAAAAACCGTTCATGAGTGTGTACCTC  |
| CpaD Y410L  | CAAGGGGAAAAAACCGCTGATGAGTGTGTACCTC  |
| CpaD Y414F  | CGTACATGAGTGTGTTCCCTCCATACCTTCG     |

**Scheme S1.** Preparation of tyrosine-derived tetramic acid **15**.

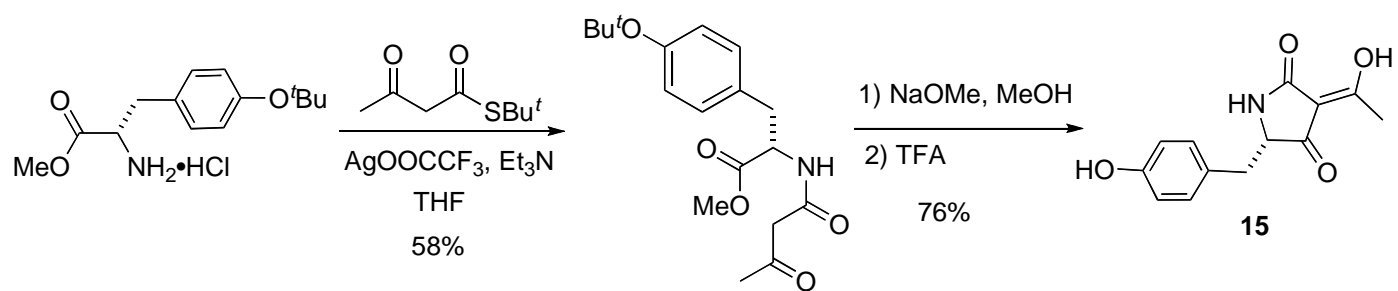

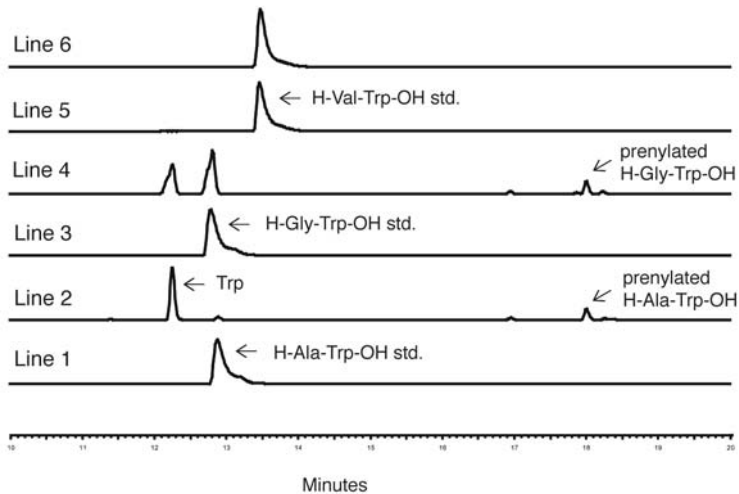

**Figure S1.** C-terminal tryptophan containing dipeptides are not good substrates for CpaD. HPLC traces Lane 1: H-Ala-Trp-OH standard; Lane 2: HPLC trace after incubating H-Ala-Trp-OH (250  $\mu$ M), DMAPP (250  $\mu$ M), CpaD (1 $\mu$ M) at 30  $^{\circ}$ C for 15 h. Trace amount of prenylated H-Ala-Trp-OH was detected with L-tryptophan as the major product. Lane 3: H-Gly-Trp-OH standard; Lane 4: HPLC trace after incubating H-Gly-Trp-OH (250  $\mu$ M), DMAPP (250  $\mu$ M), CpaD (1 $\mu$ M) at 30  $^{\circ}$ C for 15 h. Trace amount of prenylated H-Gly-Trp-OH was detected with L-tryptophan as the major product. Lane 5: H-Val-Trp-OH standard; Lane 6: HPLC trace after incubating H-Val-Trp-OH (250  $\mu$ M), DMAPP (250  $\mu$ M), CpaD (1 $\mu$ M) at 30  $^{\circ}$ C for 15 h. No prenylated H-Ala-Trp-OH and L-tryptophan detected as products.

|                       |                                                                   |
|-----------------------|-------------------------------------------------------------------|
| <i>A.oryzae</i> _CpaD | MEISKKAATLLPKPFYVLSQALNLSNKDHTKWWYSTAPMFATMMAGAGYDVHAQYKFLCI 60   |
| <i>A.flavus</i> _CpaD | MEISRKAATELKPFFHVSQALNLSNKDHAKWWYSTAPMFATMMASAGYDVHAQYKFLCI 60    |
| <i>A.oryzae</i> _CpaD | HREVIIPALGPYPEKGQPMHWKSHLTRFGLPFELSFNYSKSLLRFAFEPLGSLTGTKDDP 120  |
| <i>A.flavus</i> _CpaD | HREVIIPALGPYPEKGQPMHWKSHLTRFGLPFELSFNYSKSLLRFAFEPLGSLTGTEHDP 120  |
| <i>A.oryzae</i> _CpaD | FNTQAIRPVLQDLKAMVPGLDLEWFDHFTKALVVSEEEARTLLDRDIEIPVFKTQNKLA 180   |
| <i>A.flavus</i> _CpaD | FNTQAIRPVLQDLKGIVPGLNLEWFDHFTKALVVSDEEAQALRDGDIEIPVFKTQNKLA 180   |
| <i>A.oryzae</i> _CpaD | DLEPSGDIVLKYIYPRIKSIATGTPKERLMFDAIKAADKFGKVATPLAILEEFIAERAP 240   |
| <i>A.flavus</i> _CpaD | DLEPSGDIVLKYIYPRIKSIATGTPKERLMFDAIKAADKCGKITAPLAILKEFIAERAP 240   |
| <i>A.oryzae</i> _CpaD | TLLGHFLSCDLVKPSESRIKVYCMERQLDLASIEGIWTLNGRRNDPETLDGLDALRELWQ 300  |
| <i>A.flavus</i> _CpaD | TLLGHFLSCDLVKPSESRIKVYCMERQLDLASIEGIWTLNGRRNDPETLEGLDALRELWQ 300  |
| <i>A.oryzae</i> _CpaD | LLPVTEGLCPLPNCFYEPGTSPQEQLPFIINFTLSPKSALPEPQIYFPAFGQNDKTIAEG 360  |
| <i>A.flavus</i> _CpaD | LLPITEGLCPLPNCFYEPGTSPQEQLPFIINFTLSPKSPLPEPQIYFPAFGQNDRAIAEG 360  |
| <i>A.oryzae</i> _CpaD | LATFFESRGWGGLAKSYPADLASYYPDVDLQNTANHLQAWISFSYKGGKPYMSVYLHTFEA 420 |
| <i>A.flavus</i> _CpaD | LATFFERRGWGGLAKTYPADLASYYPDVDLNTANHLQAWISFSYKGGKPYMSVYLHTFEA 420  |
| <i>A.oryzae</i> _CpaD | FSAAAQEVAMCHDGHNP 437                                             |
| <i>A.flavus</i> _CpaD | FSGAAQEVSMCRDGHNH 437                                             |

**Figure S2.** Alignment of CpaD sequences from *A. oryzae* RIB40 and revised *A. flavus* NRRL3357 sequence. Amino acid residues shown in red indicate those missed from the predicted CpaD sequence as shown in the *Aspergillus* comparative database. (see [http://www.broadinstitute.org/annotation/genome/aspergillus\\_group/GeneDetails.html?sp=S7000001155820388](http://www.broadinstitute.org/annotation/genome/aspergillus_group/GeneDetails.html?sp=S7000001155820388))

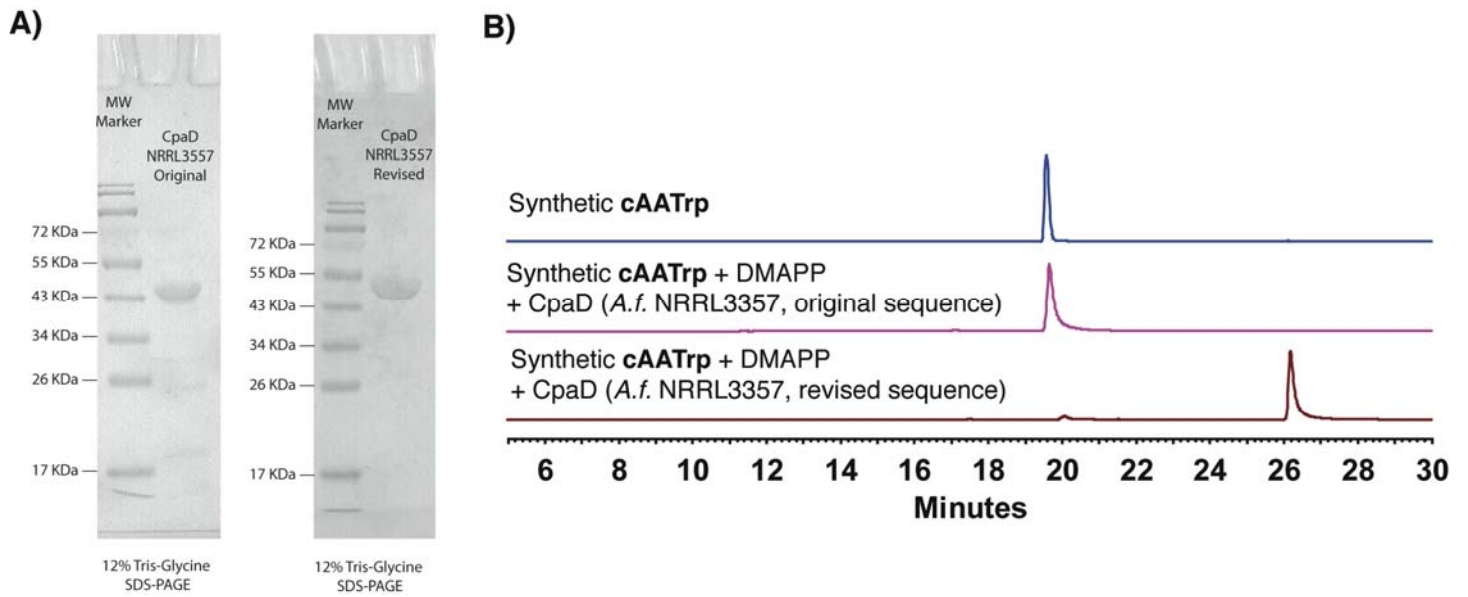

**Figure S3.** In vitro reconstitution of *A. flavus* NRRL3357 CpaD activities based on the original and revised protein sequences. (A) SDS-PAGE gel showing the heterologously overexpressed and purified CpaDs based on the original and revised protein sequences. (B) HPLC assay showing the inactive and active natures of CpaDs overexpressed based on the original and revised protein sequences respectively.
